# Supplementary material for: Performance Investigation of Proteomic Identification by HCD/CID Fragmentations in Combination with High/Low-Resolution Detectors on a Tribrid, High-Field Orbitrap Instrument
Source: PubMed Central journal article supplement (PMC4966894; doi:10.1371/journal.pone.0160160), 2016-07-29
Supplement: pone.0160160.s002.pdf [file pone.0160160.s002.pdf]

S2 Fig

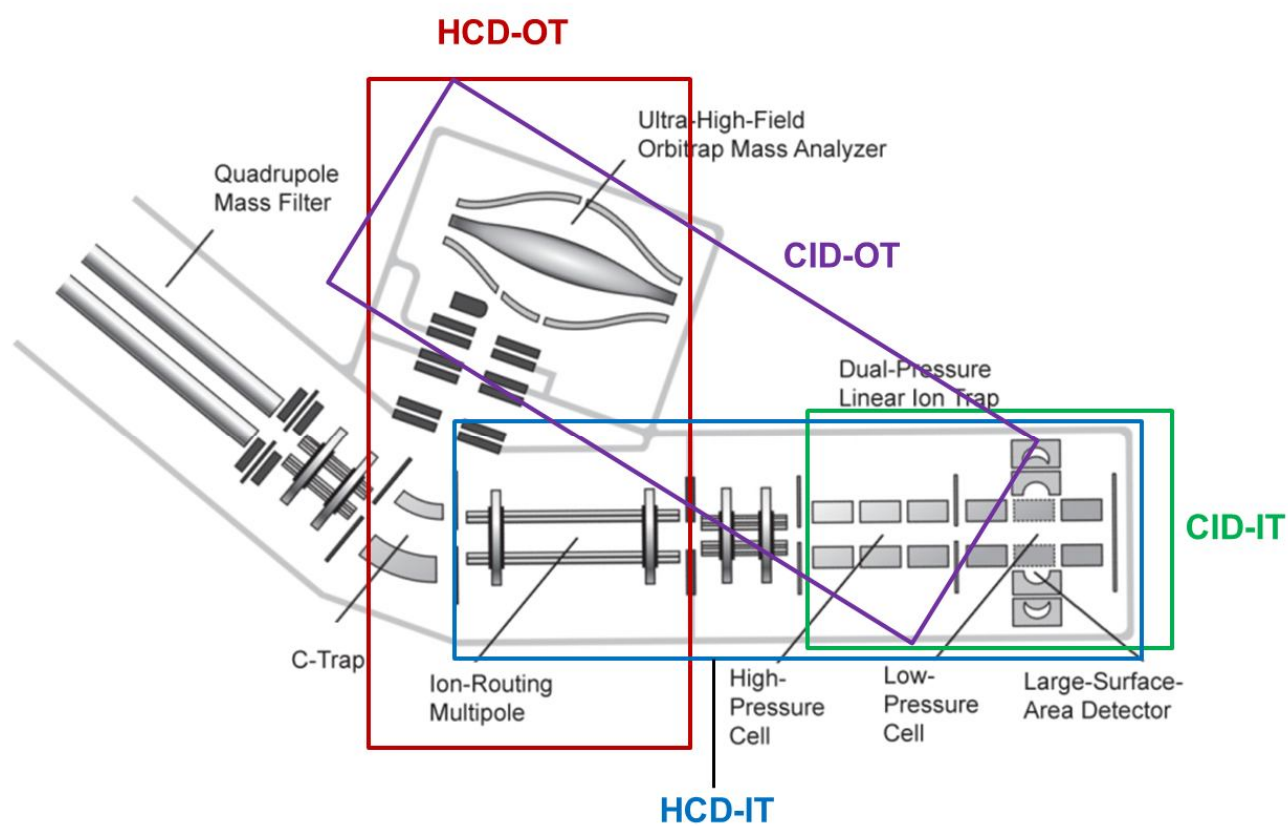

S2 Fig. The four MS<sub>2</sub> acquisition methods in the Orbitrap Fusion mass spectrometry analyzed in this study. HCD-OT, HCD-IT, CID-IT and CID-OT were indicated here. ETD-IT and ETD-OT are also available in Orbitrap Fusion, but they are not investigated in this study.
