# Supplementary material for: Performance Investigation of Proteomic Identification by HCD/CID Fragmentations in Combination with High/Low-Resolution Detectors on a Tribrid, High-Field Orbitrap Instrument
Source: PubMed Central journal article supplement (PMC4966894; doi:10.1371/journal.pone.0160160), 2016-07-29
Supplement: pone.0160160.s004.pdf [file pone.0160160.s004.pdf]

S4 Fig

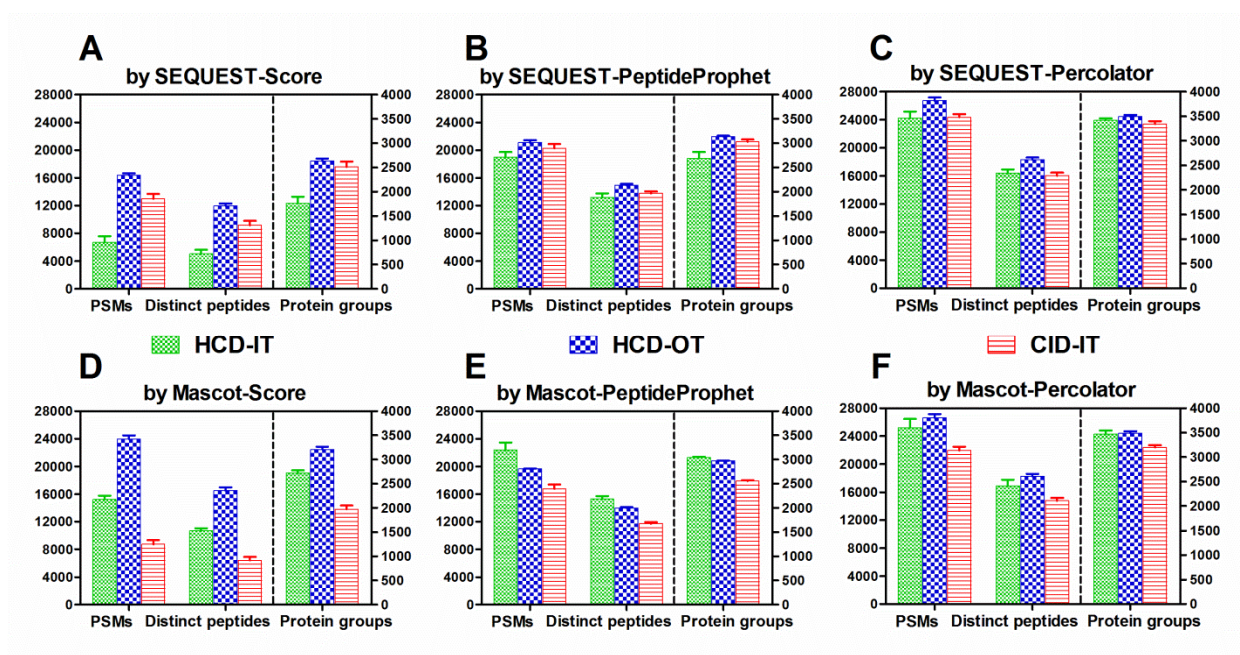

S4 Fig. Peptide spectra matches (PSMs), distinct peptides and protein groups from the separate LC-MS/MS analyses for the comparison of HCD-OT, HCD-IT, and CID-IT. Six different MS data interpretation approaches were used in this study (A-F) by combining SEQUEST or Mascot with different post-processing methods such as score-based, PeptideProphet, and Percolator.
