# Supplementary material for: Performance Investigation of Proteomic Identification by HCD/CID Fragmentations in Combination with High/Low-Resolution Detectors on a Tribrid, High-Field Orbitrap Instrument
Source: PubMed Central journal article supplement (PMC4966894; doi:10.1371/journal.pone.0160160), 2016-07-29
Supplement: pone.0160160.s005.pdf [file pone.0160160.s005.pdf]

S5 Fig

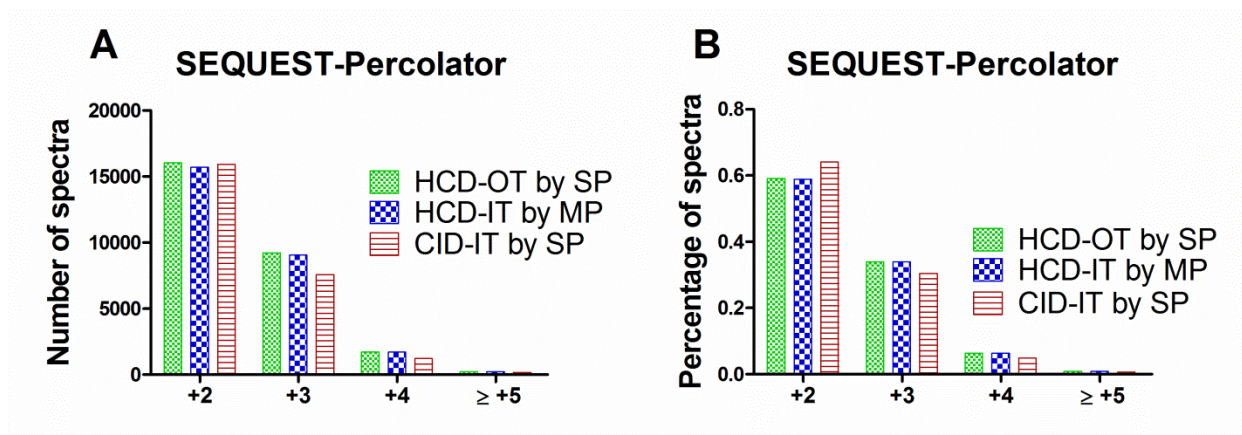

S5 Fig. The comparison of HCD-OT by SP, HCD-IT by MP, and CID-IT by SP for separate LC-MS/MS analyses. (A) Number of spectra for +2, +3, +4 and  $\geq 5$  charged; (B) Percentage of spectra for for +2, +3, +4 and  $\geq 5$  charged ions from these three MS2 acquisition methods. SP: SEQUEST-Percolator; MP: Mascot-Percolator.
